# Supplementary material for: Development of bioactive 2-substituted benzimidazole derivatives using an MnOx/HT nanocomposite catalyst
Source: Royal Society of Chemistry journal article supplement (doi:10.1039/d2dt02923e), 2023-01-01

## Development of bioactive 2-substituted benzimidazole derivatives by using MnO<sub>x</sub>/HT nanocomposite catalyst

Loveneesh Kumar<sup>a</sup>, Nishant Verma<sup>a</sup>, Ravi Tomar<sup>a,c</sup>, Hitesh Sehrawat<sup>a</sup>, Rupesh Kumar<sup>a,b</sup>, Ramesh Chandra<sup>a,d,e\*</sup>

[a] Drug Discovery & Development Laboratory,

Department of Chemistry,  
University of Delhi,  
Delhi 110007, India.

Email: [acbrdu@hotmail.com](mailto:acbrdu@hotmail.com), [rchandra@chemistry.du.ac.in](mailto:rchandra@chemistry.du.ac.in), [rameshchandragroup@gmail.com](mailto:rameshchandragroup@gmail.com), [director@inms.du.ac.in](mailto:director@inms.du.ac.in)

[b] Department of Chemistry,

Kirori Mal College,  
University of Delhi,  
Delhi 110007, India.

Email: [Chembio005@yahoo.co.in](mailto:Chembio005@yahoo.co.in)

[c] Department of Chemistry,

Faculty of Science,  
SGT University,  
Gurugram,  
Haryana-122505, India.

[d] Dr. B. R. Ambedkar, Centre for Biomedical Research (ACBR),

University of Delhi,  
Delhi 110007, India.

[e] Institute of Nanomedical Sciences (INMS),

University of Delhi,  
Delhi 110007, India.

## Material and Instruments

All the starting materials were procured from Thomas Baker (Mumbai, India), Alfa Aesar (England) and Spectrochem (Mumbai, India) and used without any purification. NMR spectroscopy was performed on JEOL (400 MHz, JNM-EXCP 400) spectrometer using  $\text{CDCl}_3$  and  $\text{DMSO-d}_6$  as NMR solvent obtained from eurisotop. The reactions were followed using silica gel 60F254 TLC (Thin layer chromatography) plates (Merck, Darstadt, Germany). Purification of synthesised substrate derivatives were done using 100-200 mesh (Merck, Mumbai, India) silica gel-based column chromatography. PHI 5000 Versa Probe II model having monochromatic  $\text{Al K}_\alpha$  945 radiation as the X-ray source was used for XPS (X-ray photoelectron spectroscopy) which was supplied by ULVAC-PHI Inc., Japan. To study morphology and qualitative analysis of the nanocomposite was performed on Scanning Electron Microscope (JEOL Japan, JSM 6610LV). Zetasizer Nano ZS90 (Malvern Instruments Ltd., UK), equipped with He-Ne (4 mW, 632.8 nm) was used for DLS (Dynamic Light Scattering) analysis. TEM (Transmission Electron Microscopy) analysis was performed on LaB<sub>6</sub>/Tungsten filaments emitter-based JEM-1400 Transmission Electron Microscope. Thermal stability of synthesized materials was performed on TGA/DA instrument (Perkin Elmer, pyrisdiamond TGA/DA). XRD analysis was done on a Bruker Discover D8 with  $\text{Cu K}\alpha$  radiation (3 kW). Gas chromatography studies were performed with a PerkinElmer Clarus 580 equipped with RTX-5SIL-MS column. Atomic Absorption spectroscopic studies were performed on Varian 220FS Atomic Absorption Spectrophotometer. HRMS studies was done on Agilent G6530AA with ESI and APCI source.

## Reaction Procedure

A 10 ml round bottom flask was charged with substrate *o*-phenylenediamine (1 mmol), aldehyde (1 mmol), Solvent ethanol: water (50:50) 1 ml, and catalyst 20 mg. Then, the reaction mixture was stirred at room temperature for 1 hr. The reaction was monitored by TLC. After the reaction was completed, the resulting solution was extracted with EtOAc and dried over anhydrous  $\text{Na}_2\text{SO}_4$ . Following that, it was filtered to remove the catalyst, concentrated in vacuo, and Gas chromatography (GC) was done. If the GC graph indicated the presence of aldehyde or *o*-phenylenediamine in the reaction mixture then it was purified by column chromatography using hexane/ethyl acetate as eluent to afford the corresponding pure products. Otherwise, the reaction mixture is simply recrystallized using ethanol to get the pure product. **The purity of the synthesised compound was confirmed by High resolution mass spectrometry (HRMS).**

(Note: For Gas chromatography, the reaction mixture was analysed after workup and dried. AR Grade Methanol was taken as a solvent for the preparation of GC solutions).

### XPS full range plot of MnO<sub>x</sub>/HT nanocomposite catalyst

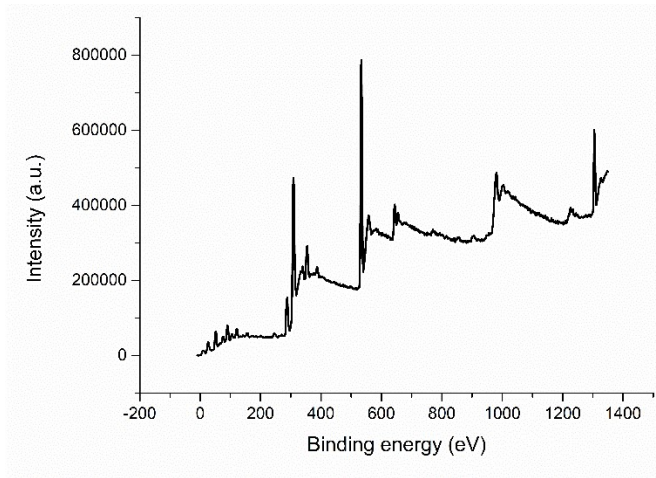

### Narrow Scan XPS Plot of Al

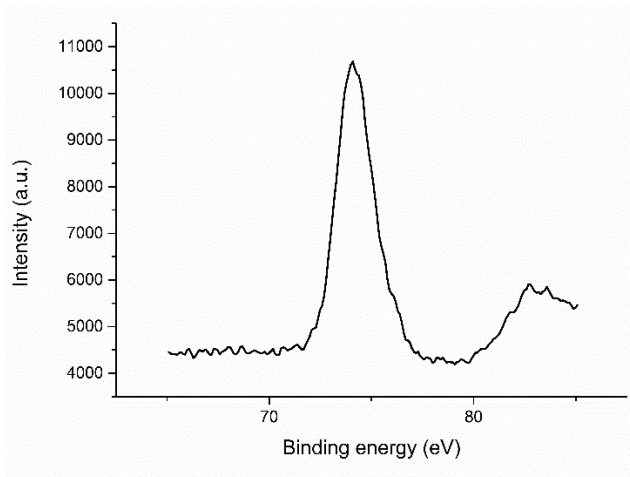

### Narrow Scan XPS Plot of Carbon

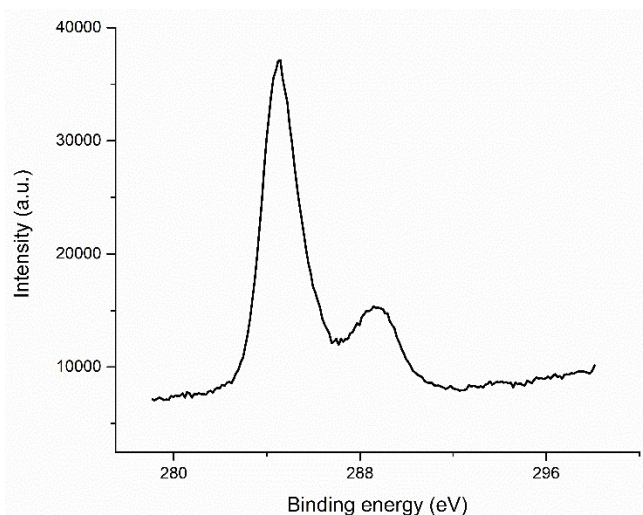

### Narrow Scan XPS Plot of Magnesium

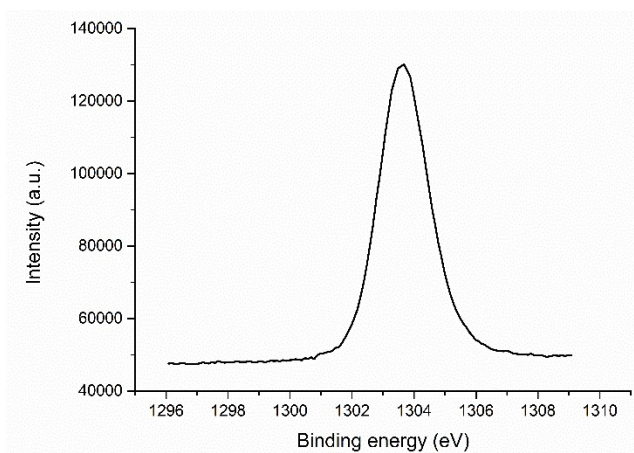

### Calculation for metal loading:

$$\text{Metal loading} = \frac{\text{Concentration of metal (ppm)} \times \text{Volume of extract (Litre)}}{\text{Weight of solid sample taken for extraction (grams)}} =$$

### Calculation for mol% of catalyst:

$$\text{Mol \% of catalyst used} = \frac{\text{no. of moles of catalyst used}}{(\text{no. of moles of catalyst used} + \text{no. of moles of limiting reagent})} \times 100 =$$

### Calculation for TON:

$$\text{TON} = \frac{\% \text{ Conversion}}{\text{mmoles of catalysts}}$$

### Calculation for TOF:

$$\text{TOF} = \frac{\text{TON}}{\text{Times of reaction (h)}}$$

### Calculation for Green Matrix:

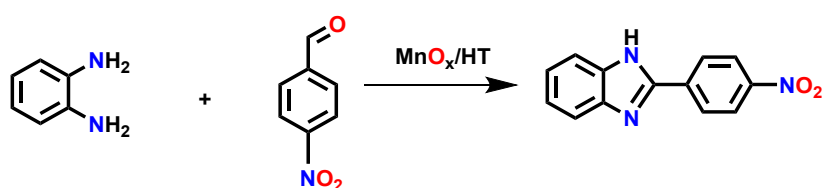

|        |              |              |               |
|--------|--------------|--------------|---------------|
| M.W.   | 108.14 g/mol | 151.12 g/mol | 239.234 g/mol |
| Mmol   | 1.0          | 1.0          | 0.96          |
| Amount | 108 mg       | 151 mg       | 229 mg        |

### E-factor:

The ideal value of E-factor is zero.

E-factor = [total mass of raw materials - the total mass of product]/ mass of product.

$$\begin{aligned} \text{E-factor of i} &= [(108 + 151) - 229] / 229 \\ &= 0.13 \end{aligned}$$

### Process mass intensity (PMI):

$$\begin{aligned} \text{PMI} &= \sum (\text{mass of stoichiometric reactants}) / [\text{mass of product}] \\ &= (108 + 151) / 229 \\ &= 1.13. \end{aligned}$$

### Reaction mass efficiency (RME):

$$\text{RME} = [\text{mass of product} / \sum (\text{mass of stoichiometric reactants})] \times 100$$

$$= [229 / (108 + 151)] \times 100$$

$$= 88.41 \%$$

**Carbon efficiency (CE):**

CE denotes the percentage of carbon in the reactants that remains in the product.

$$\text{CE} = [\text{Amount of carbon in product} / \text{Total carbon present in reactants}] \times 100$$

$$= [\text{no. of moles of product} \times \text{no. of carbons in product} / (\text{moles of a} \times \text{carbons in 1} + \text{moles of y carbons in 2})] \times 100$$

$$= [0.96 \times 13 / (1.0 \times 7 + 1.0 \times 6)] \times 100$$

$$= [12.48 / (7 + 6)] \times 100$$

$$= 96\%$$

## NMR data of Selective Compounds:

(4a) 2-(2-nitrophenyl)-1H-benzo[d]imidazole

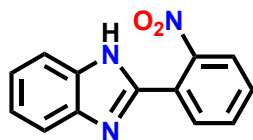

NMR (400 MHz,  $\text{CDCl}_3$ )  $\delta$  (ppm) 8.97 (d,  $J = 4.5$  Hz, 1H), 8.27 – 8.24 (m, 1H), 8.01 – 7.97 (m, 1H), 7.72 – 7.65 (m, 1H), 7.59 – 7.54 (m, 1H), 7.15 – 7.07 (m, 2H), 6.79 – 6.72 (m, 2H).  
 $^{13}\text{C}$  NMR (100 MHz,  $\text{CDCl}_3$ )  $\delta$  (ppm) 152.04, 149.37, 143.05, 135.98, 133.28, 131.03, 129.81, 129.03, 124.57, 118.61, 117.54, 115.84.

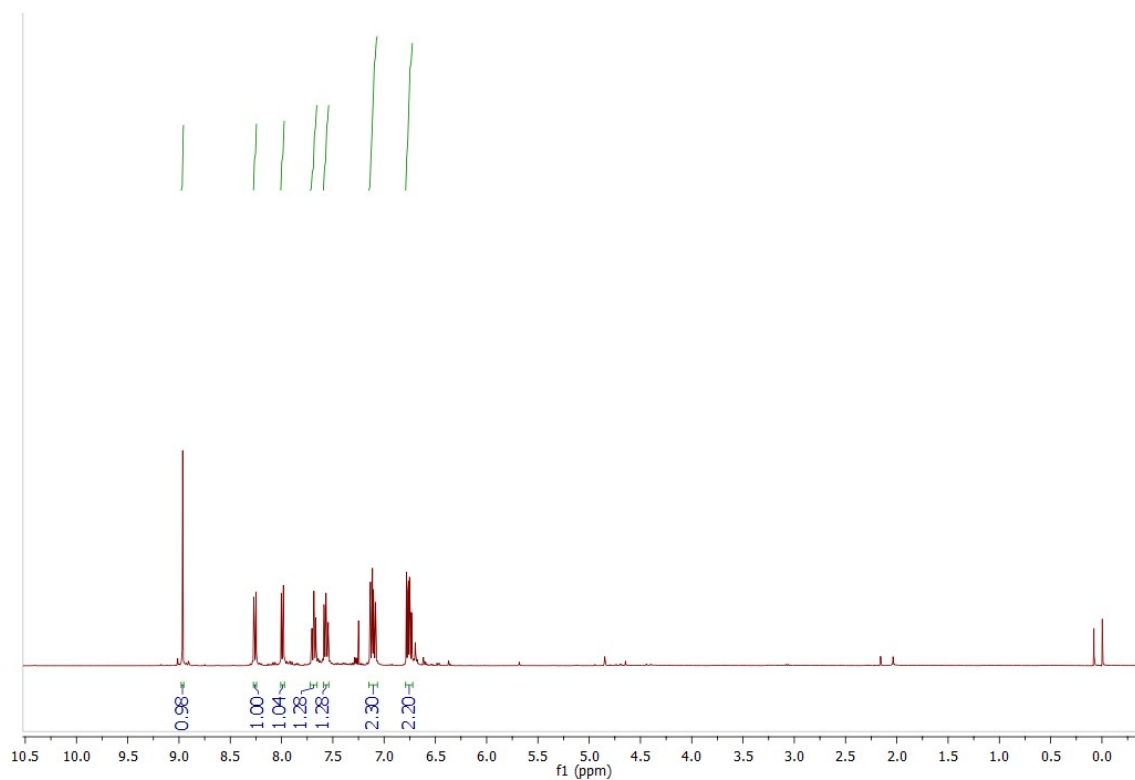

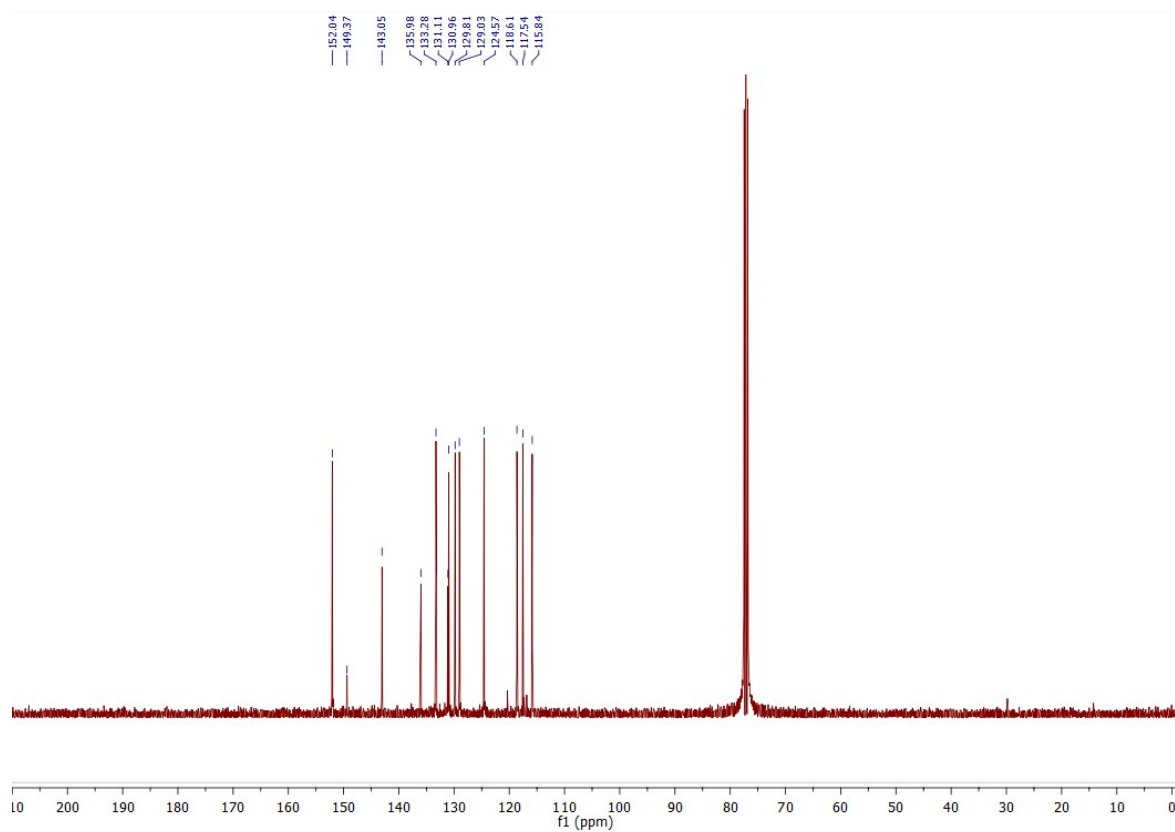

(4c) 2-(4-nitrophenyl)-1H-benzo[d]imidazole

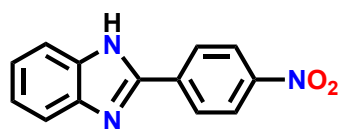

NMR (400 MHz)  $\delta$  8.62 (s, 1H), 8.30 (d,  $J = 8.6$  Hz, 2H), 8.04 (t,  $J = 8.3$  Hz, 2H), 7.15 – 7.08 (m, 2H), 6.82 – 6.72 (m, 2H).  $^{13}\text{C}$  NMR (100 MHz,  $\text{CDCl}_3$ )  $\delta$  (ppm) 153.86 (s), 149.07 (s), 143.21 (s), 142.02 (s), 135.82 (s), 129.72 (s), 129.38 (s), 123.93 (s), 118.85 (s), 117.55 (s), 116.14 (s).



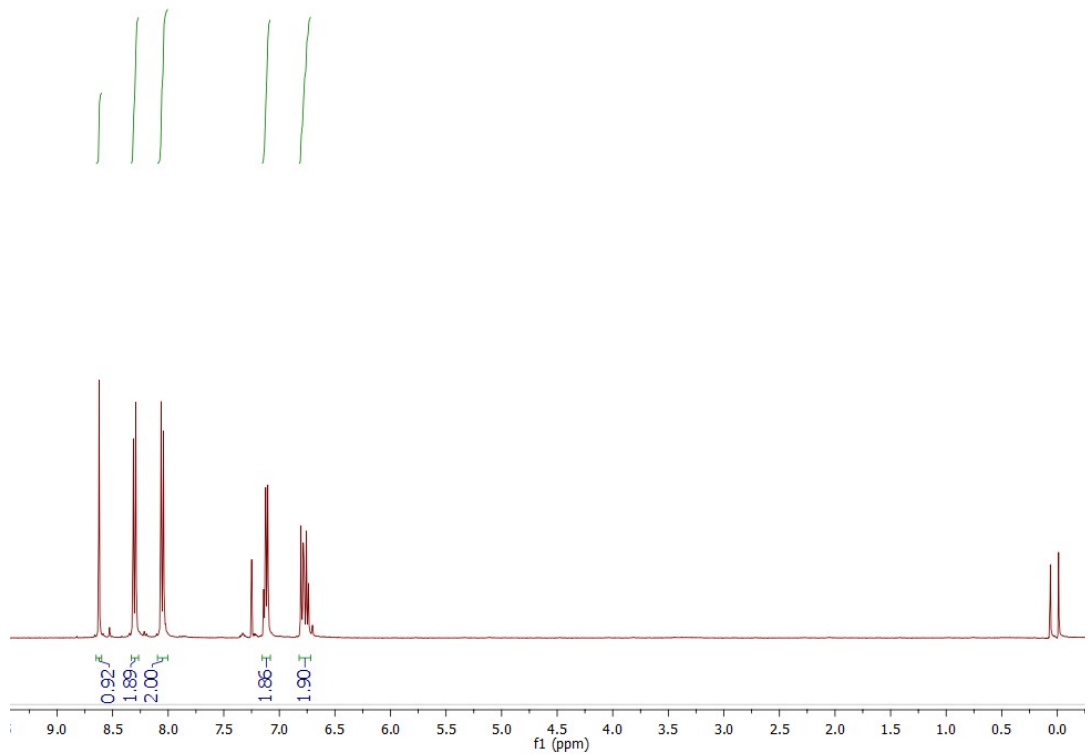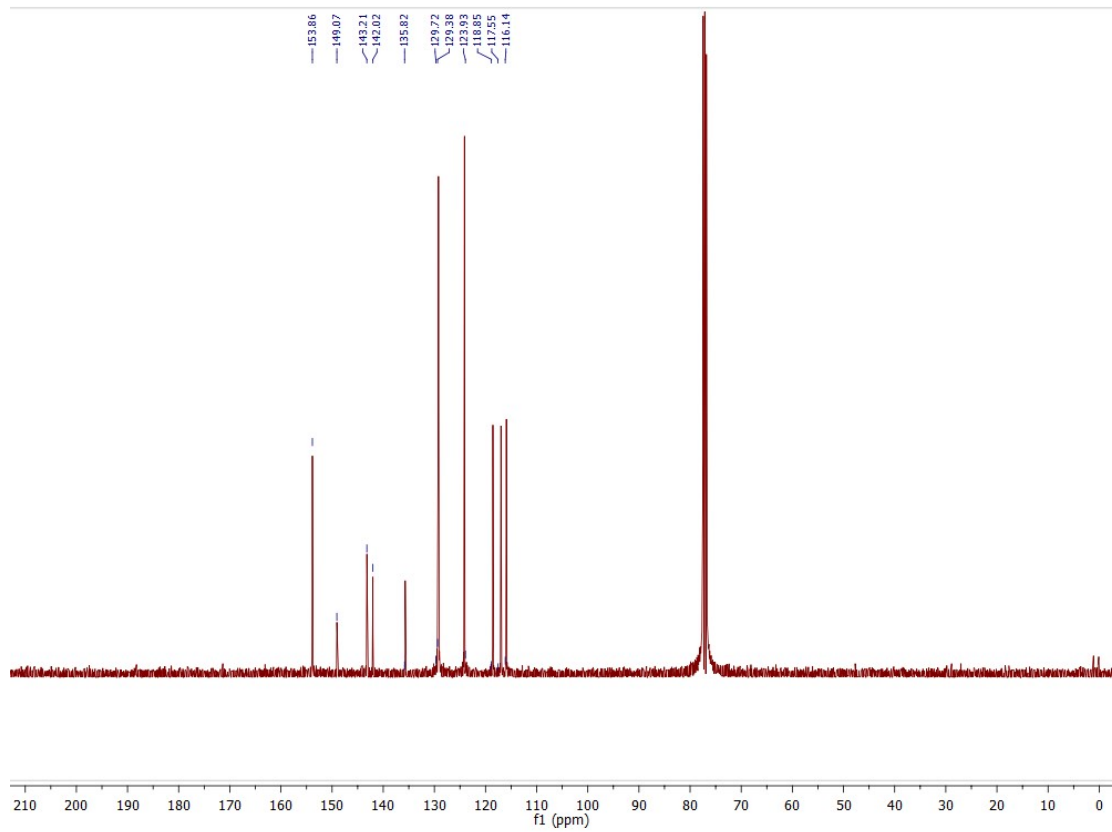

## Gas Chromatograms for the Organic Products

Gas chromatograms for various organic products with the method used:

Method: Column information Elite-5, L = 30 m, ID: 0.25 mm, injector temperature 50 °C, column flow rate 1.13 mL/min, column temperature 50 – 180°C, temperature program 10 °C/min, detector temperature 250 °C.

**Methanol** is used as the solvent.

### **(4a) 2-(2-nitrophenyl)-1H-benzo[d]imidazole**

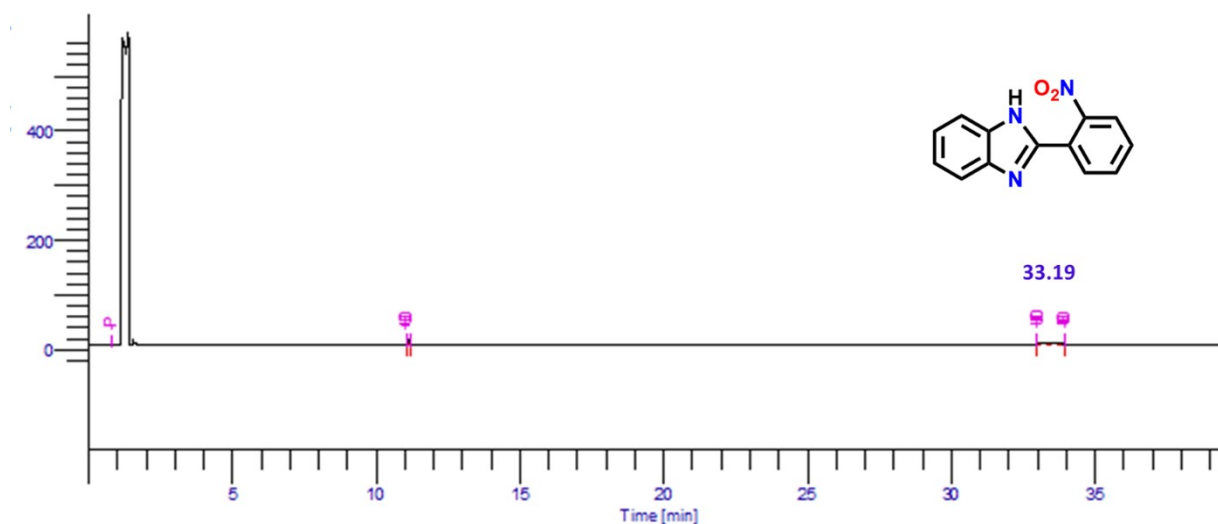

### **(4b) 2-(3-nitrophenyl)-1H-benzo[d]imidazole**

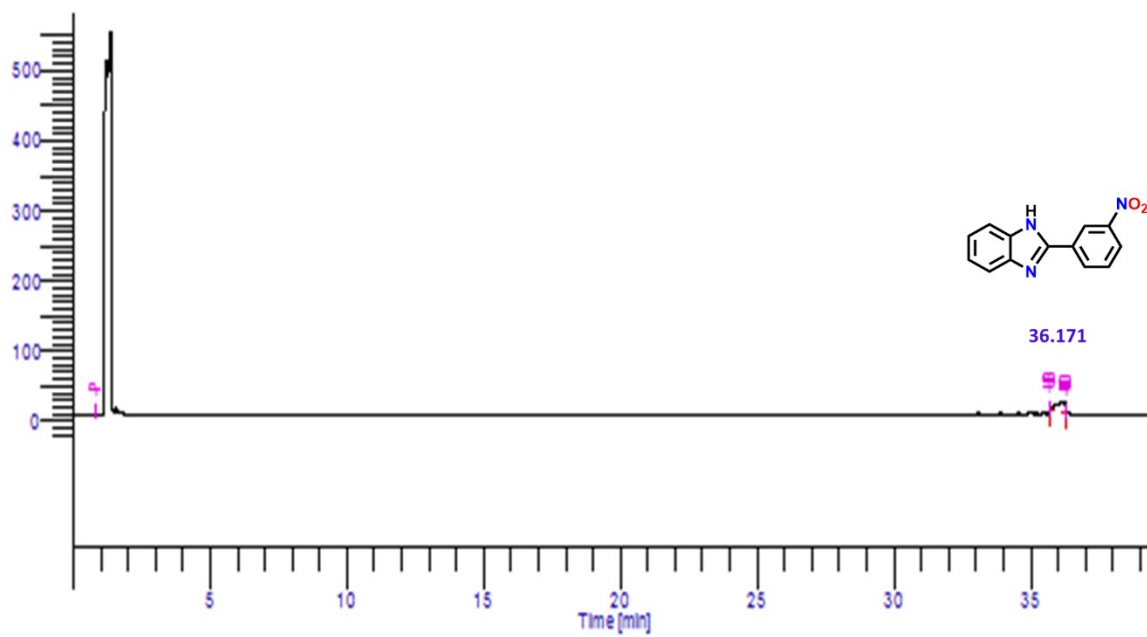

**(4c) 2-(4-nitrophenyl)-1H-benzo[d]imidazole**

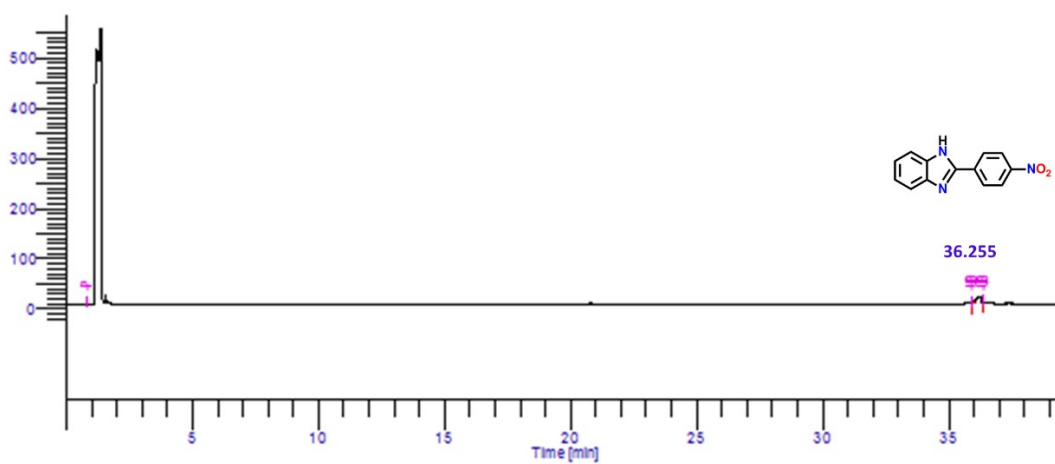

**(4d) 2-(o-tolyl)-1H-benzo[d]imidazole**

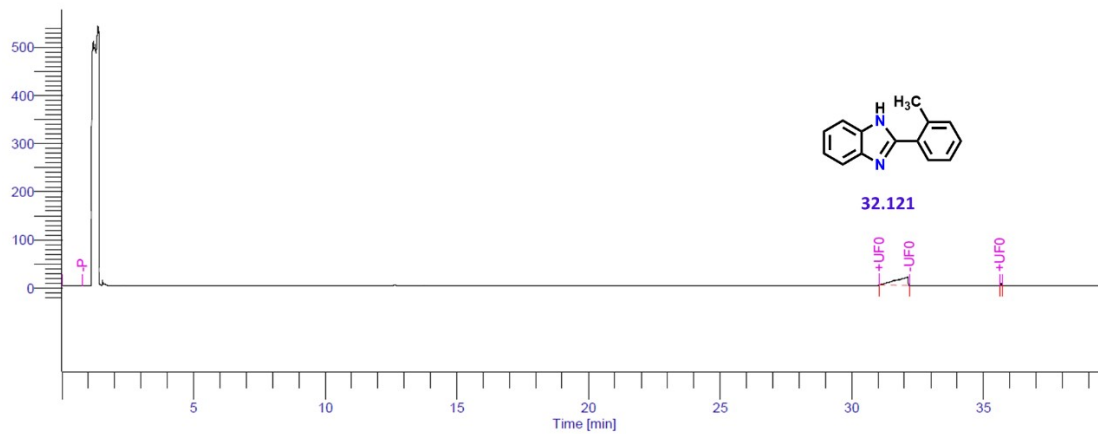

**(4e) 2-(m-tolyl)-1H-benzo[d]imidazole**

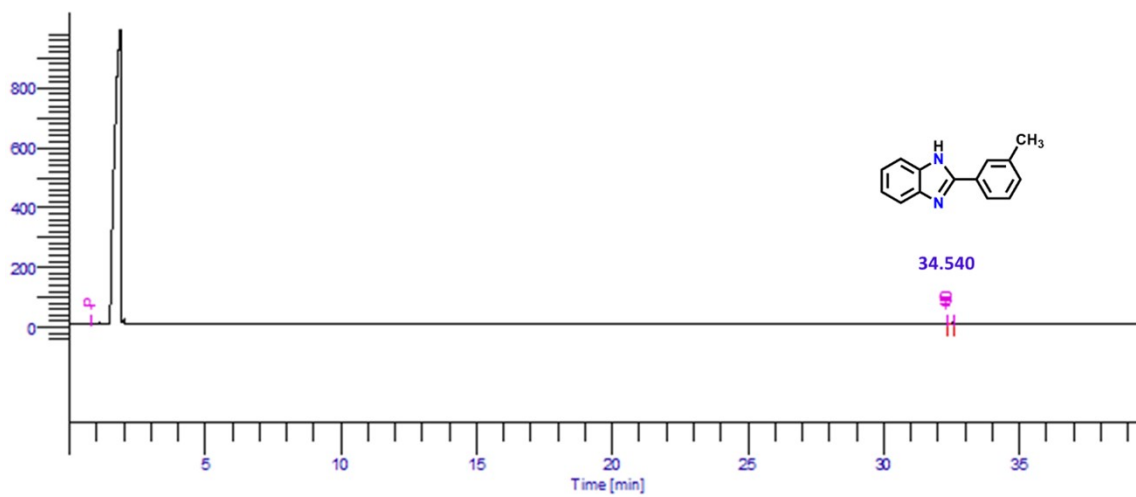

**(4f) 2-(p-tolyl)-1H-benzo[d]imidazole**

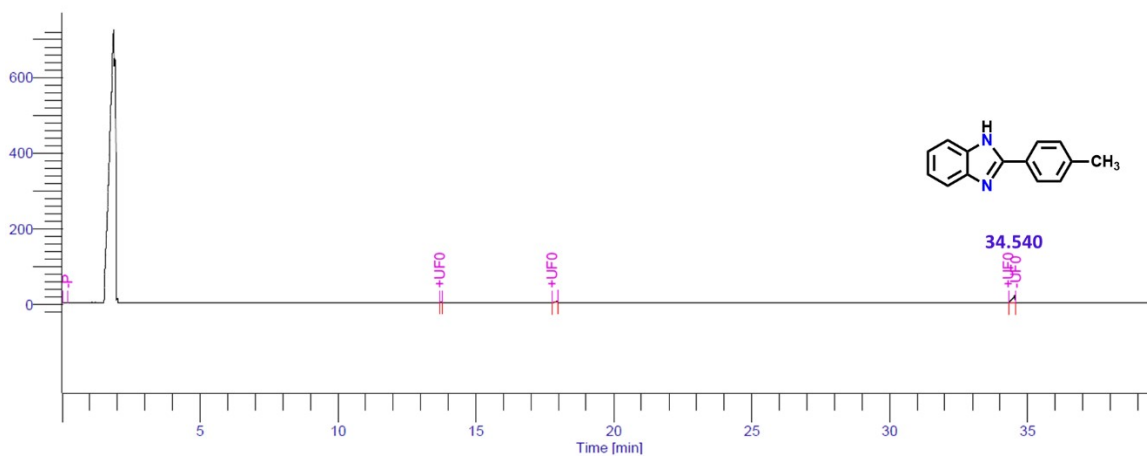

**(4g) 2-(2-methoxyphenyl)-1H-benzo[d]imidazole**

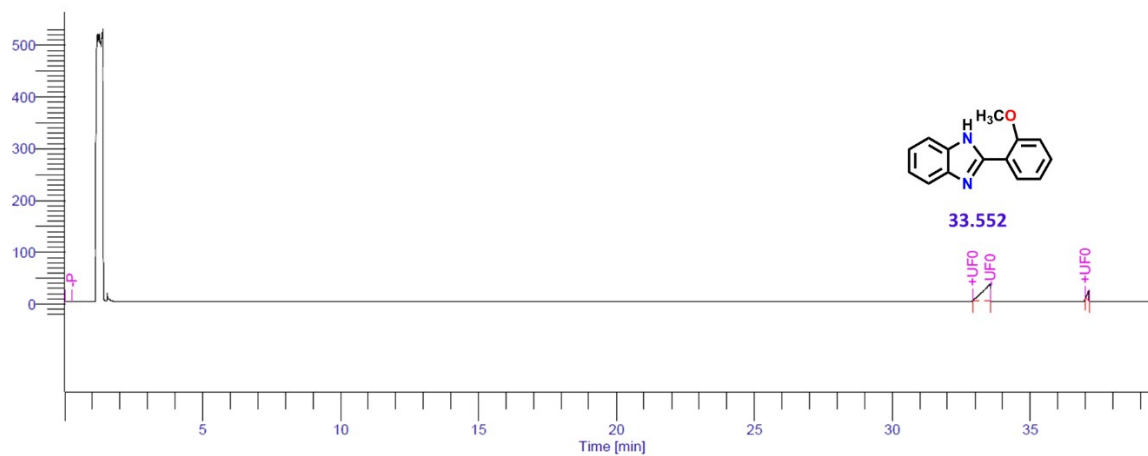

**(4h) 2-(3-methoxyphenyl)-1H-benzo[d]imidazole**

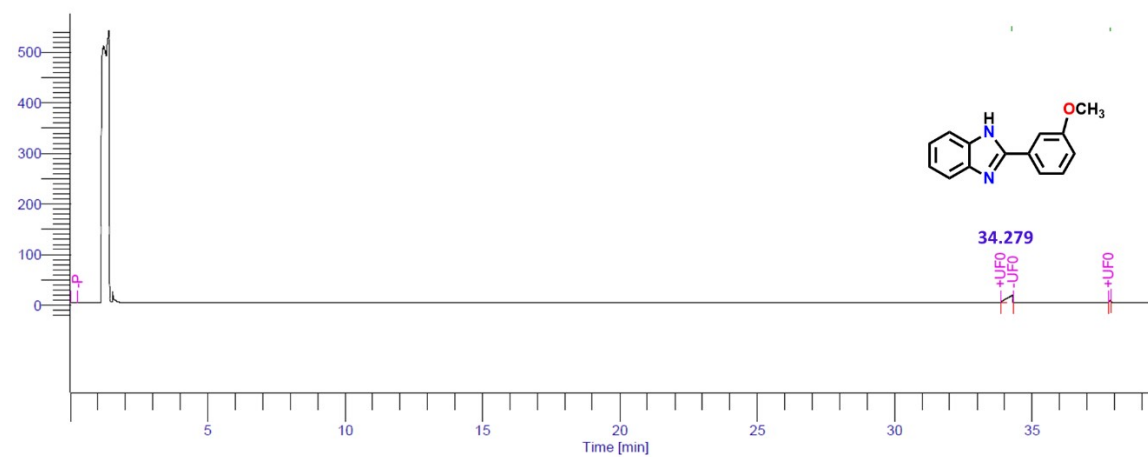

**(4i) 2-(4-methoxyphenyl)-1H-benzo[d]imidazole**

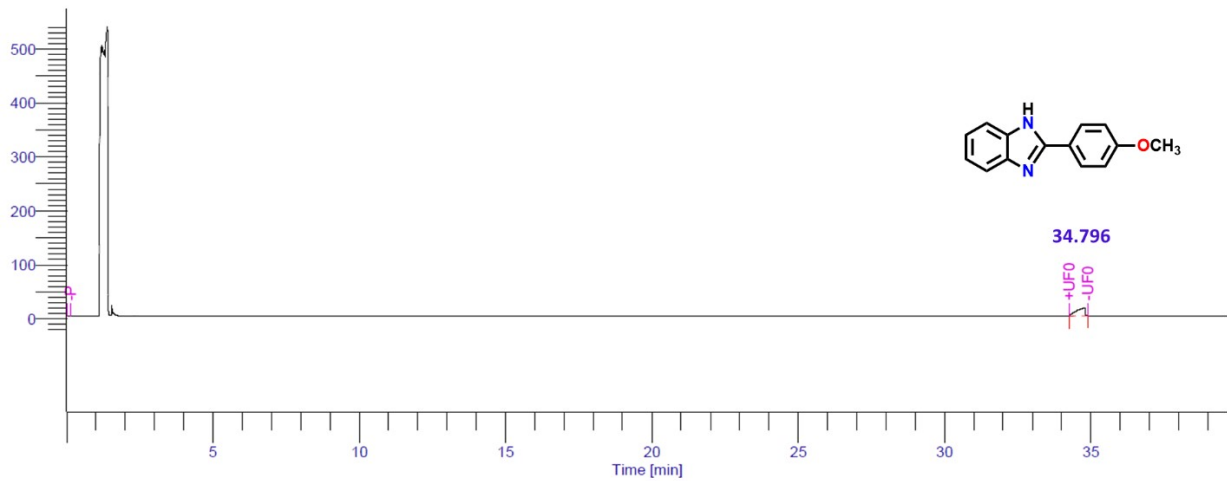

**(4j) 2-(thiophen-2-yl)-1H-benzo[d]imidazole**

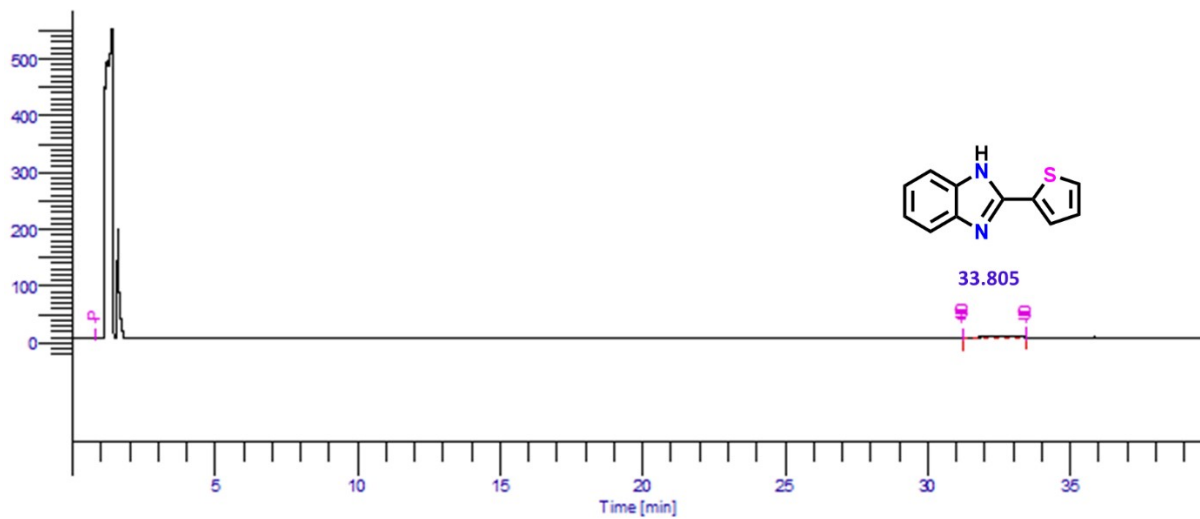

**(4k) 4-(1H-benzo[d]imidazol-2-yl)-N,N-dimethylaniline**

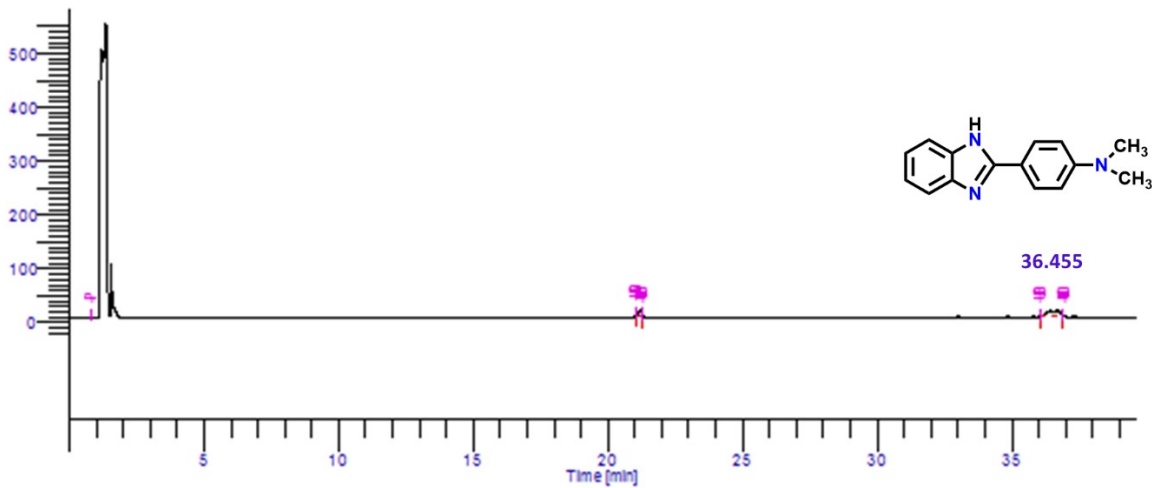

**(4l) 2-(pyridin-2-yl)-1H-benzo[d]imidazole**

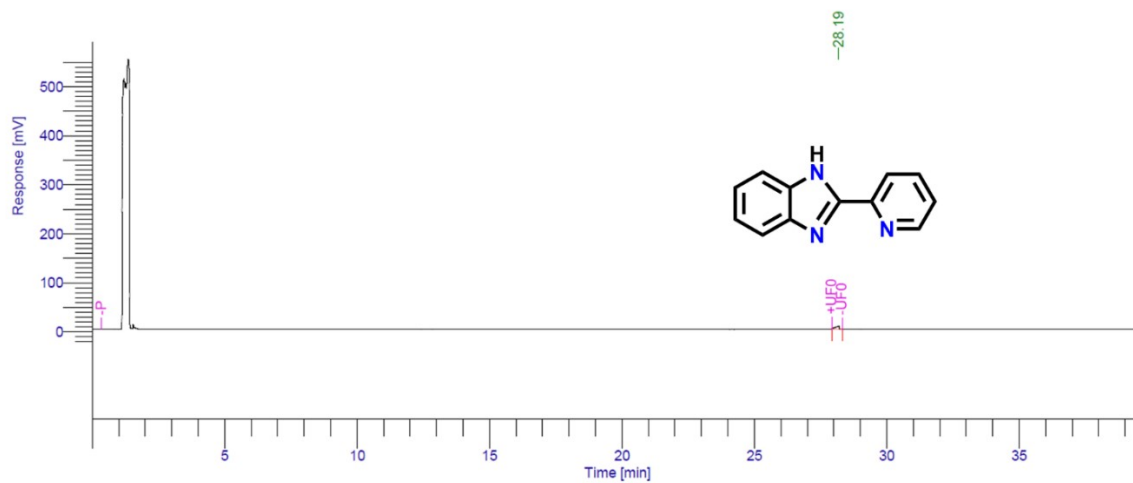

**HRMS data for the Organic Products**

**(4a) 2-(2-nitrophenyl)-1H-benzo[d]imidazole**

HRMS calculated for  $C_{13}H_9N_3O_2$   $[M+H]^+$ : 240.07 found  $[M+H]^+$ : 240.0770.

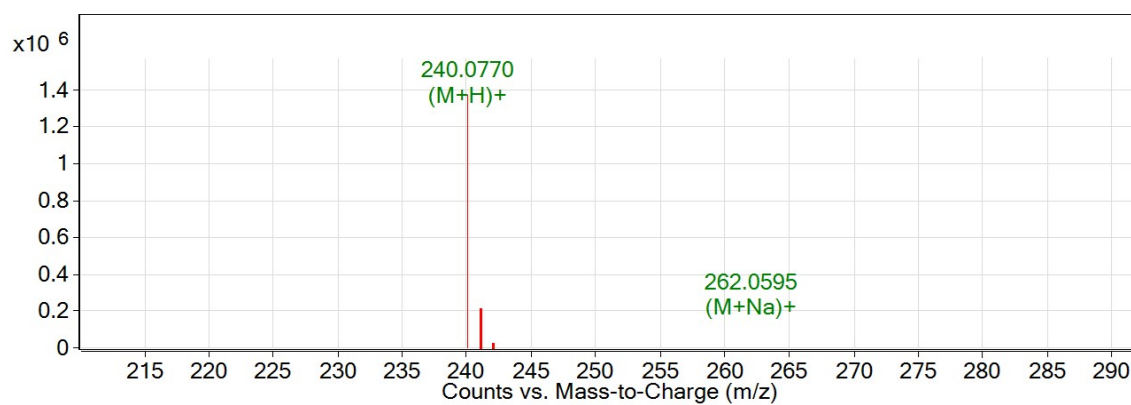

**(4b) 2-(3-nitrophenyl)-1H-benzo[d]imidazole**

HRMS calculated for  $C_{13}H_9N_3O_2$   $[M+H]^+$ : 240.07 found  $[M+H]^+$  : 240.0750.

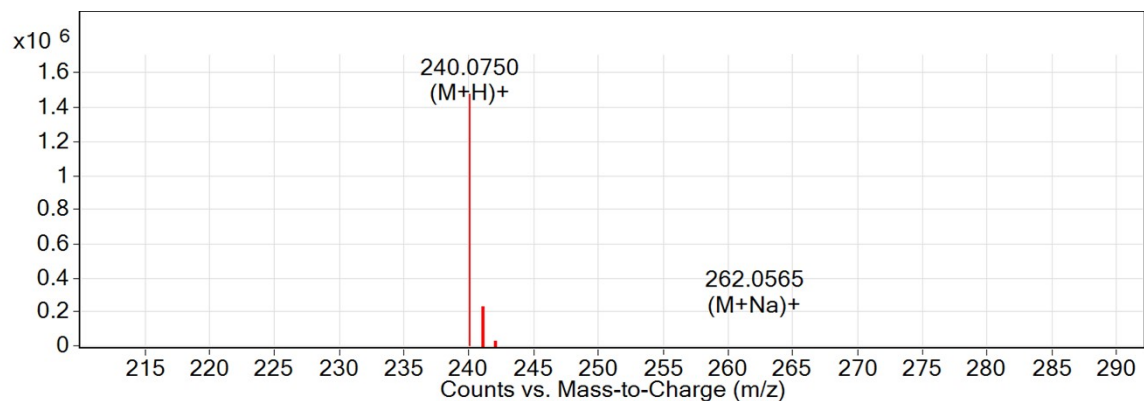

**(4c) 2-(4-nitrophenyl)-1H-benzo[d]imidazole**

HRMS calculated for  $C_{13}H_9N_3O_2$   $[M+H]^+$ : 240.07 found  $[M+H]^+$  : 240.0771.

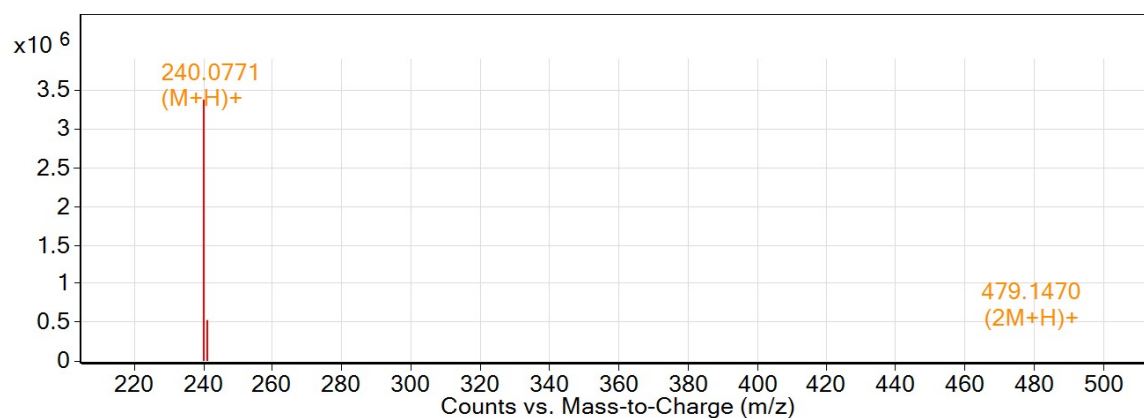

**(4d) 2-(o-tolyl)-1H-benzo[d]imidazole**

HRMS calculated for  $C_{14}H_{12}N_2$   $[M+H]^+$ : 209.10 found  $[M+H]^+$  : 209.1079.

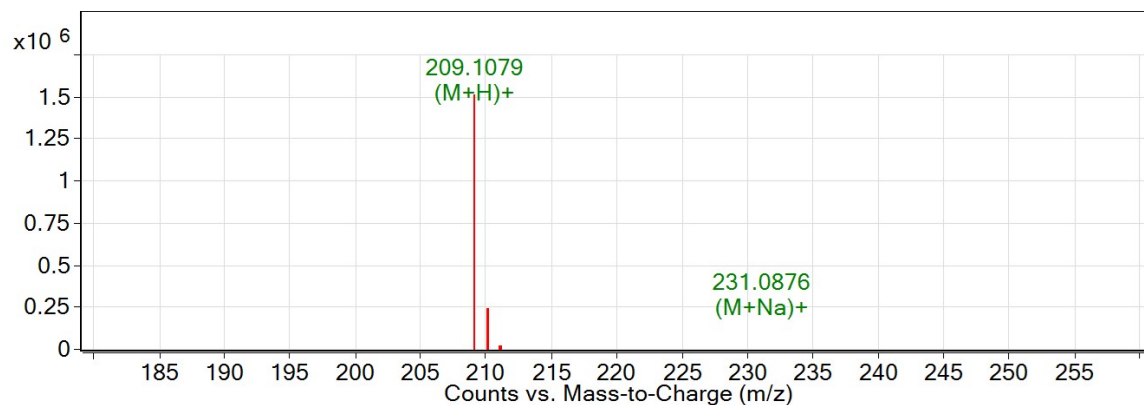



**(4e) 2-(m-tolyl)-1H-benzo[d]imidazole**

HRMS calculated for  $C_{14}H_{12}N_2$   $[M+H]^+$ : 209.10 found  $[M+H]^+$ : 209.1022.

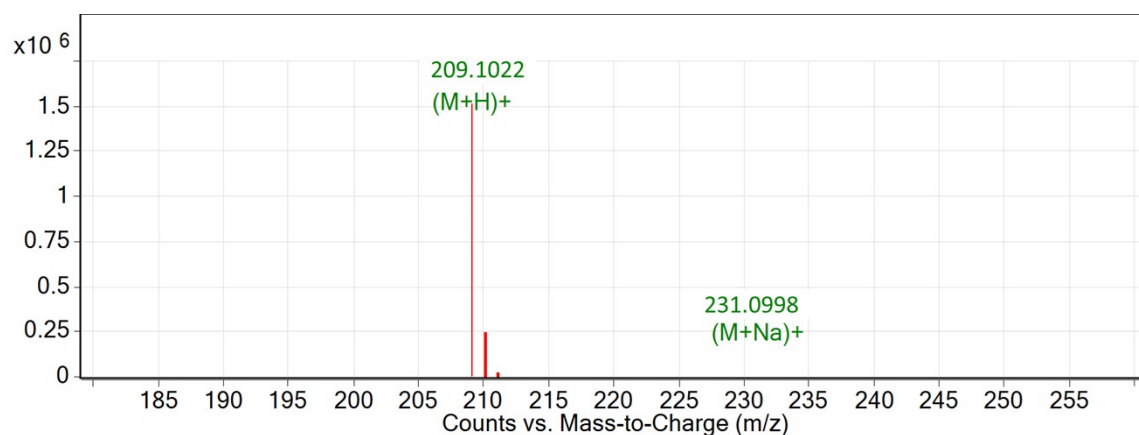

**(4f) 2-(p-tolyl)-1H-benzo[d]imidazole**

HRMS calculated for  $C_{14}H_{12}N_2$   $[M+H]^+$ : 209.10 found  $[M+H]^+$ : 209.1077.

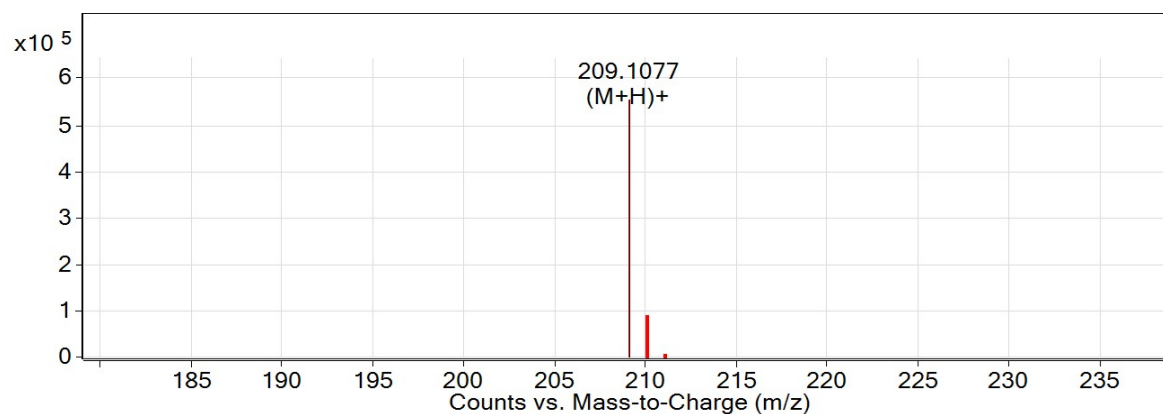

**(4g) 2-(2-methoxyphenyl)-1H-benzo[d]imidazole**

HRMS calculated for  $C_{14}H_{12}N_2O$   $[M+H]^+$ : 225.10 found  $[M+H]^+$ : 225.1026.

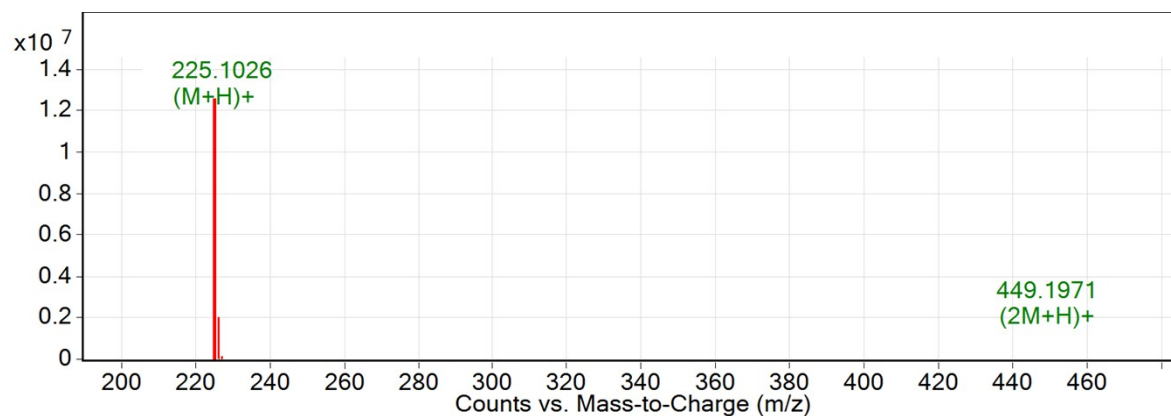

**(4h) 2-(3-methoxyphenyl)-1H-benzo[d]imidazole**

HRMS calculated for  $C_{14}H_{12}N_2O$   $[M+H]^+$ : 225.10 found  $[M+H]^+$  : 225.1030.

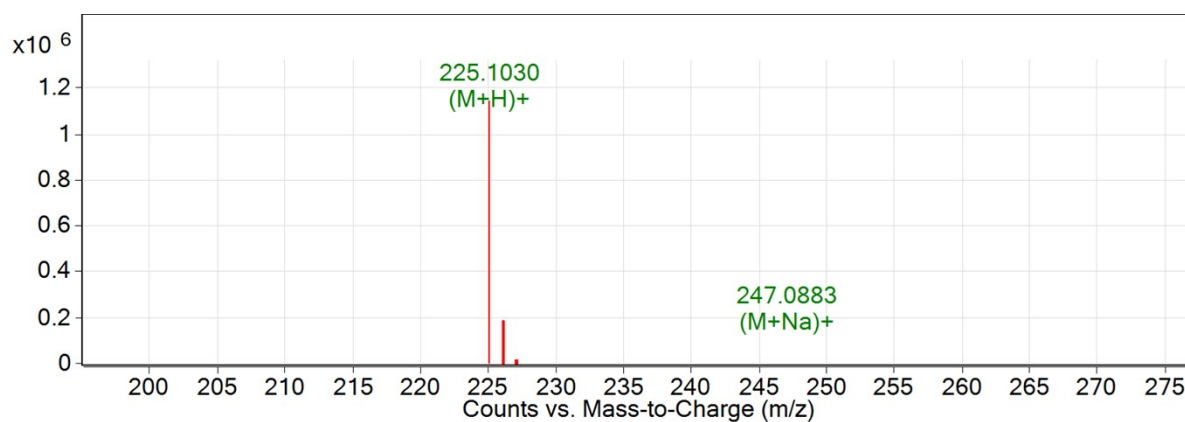

**(4i) 2-(4-methoxyphenyl)-1H-benzo[d]imidazole**

HRMS calculated for  $C_{14}H_{12}N_2O$   $[M+H]^+$ : 225.10 found  $[M+H]^+$  : 225.1044.

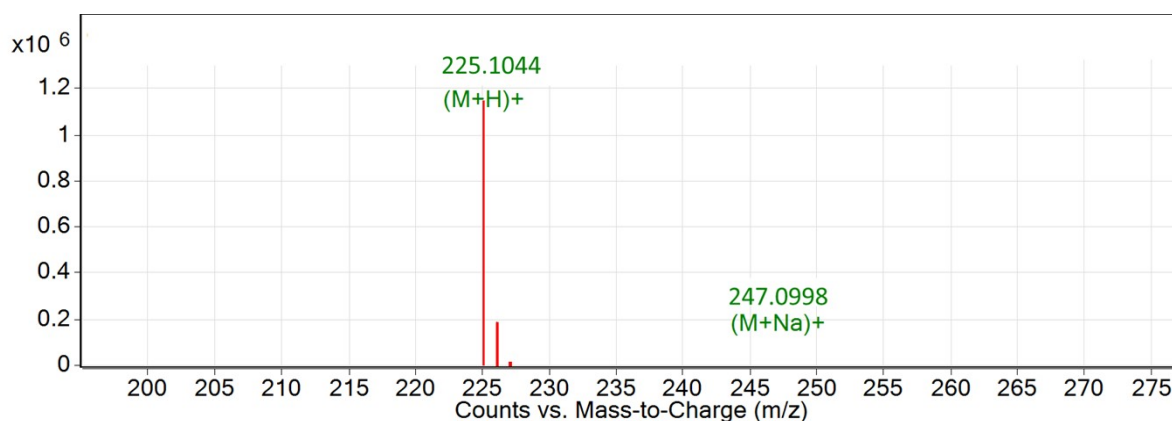

**(4j) 2-(thiophen-2-yl)-1H-benzo[d]imidazole**

HRMS calculated for  $C_{11}H_8N_2S$   $[M+H]^+$ : 201.04 found  $[M+H]^+$  : 201.0480.

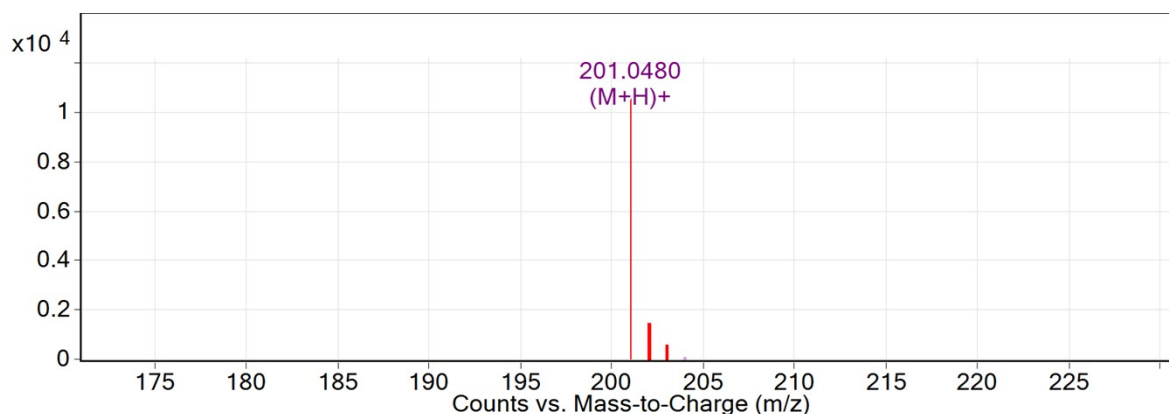

**(4k) 4-(1H-benzo[d]imidazol-2-yl)-N,N-dimethylaniline**

HRMS calculated for  $C_{15}H_{15}N_3$   $[M+H]^+$ : 238.13 found  $[M+H]^+$  : 238.1339.

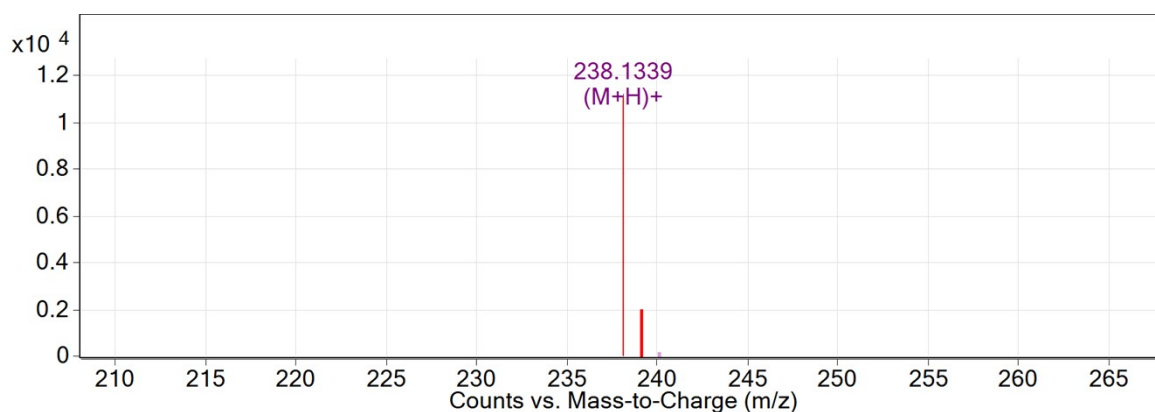

**(4l) 2-(pyridin-2-yl)-1H-benzo[d]imidazole**

HRMS calculated for  $C_{12}H_9N_3$   $[M+H]^+$ : 196.08 found  $[M+H]^+$  : 196.0865.

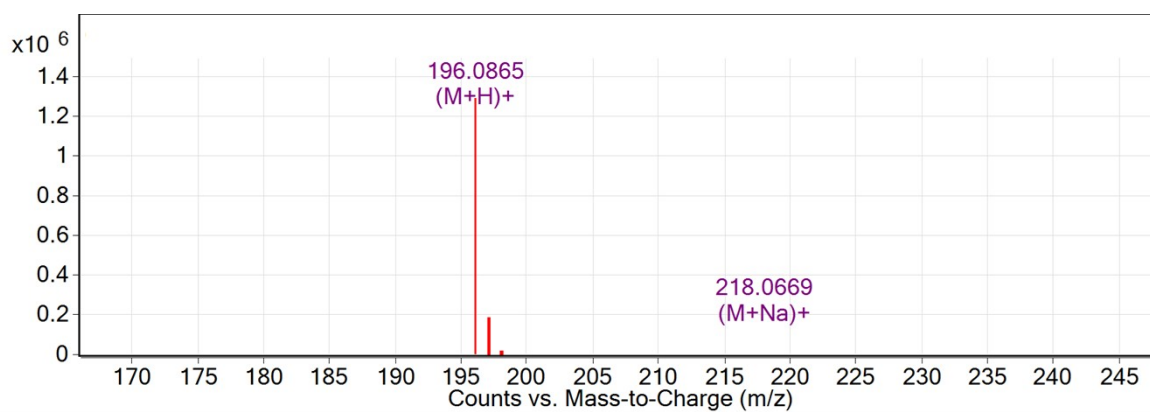

Supplement: d2dt02923e1.pdf [file d2dt02923e1.pdf]
